# Supplementary material for: Screening for a Potential Therapeutic Agent from the Herbal Formula in the 4th Edition of the Chinese National Guidelines for the Initial-Stage Management of COVID-19 via Molecular Docking
Source: PubMed Central journal article supplement (PMC7759025; doi:10.1155/2020/3219840), 2020-12-22

COVID-19

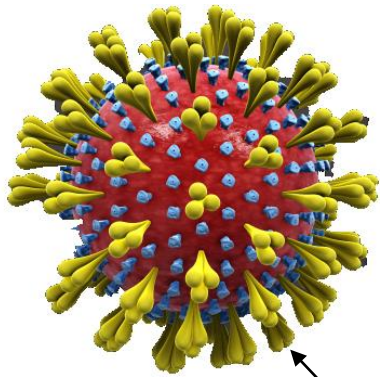

Spike Glycoprotein

Spike Glycoprotein binding ACE2

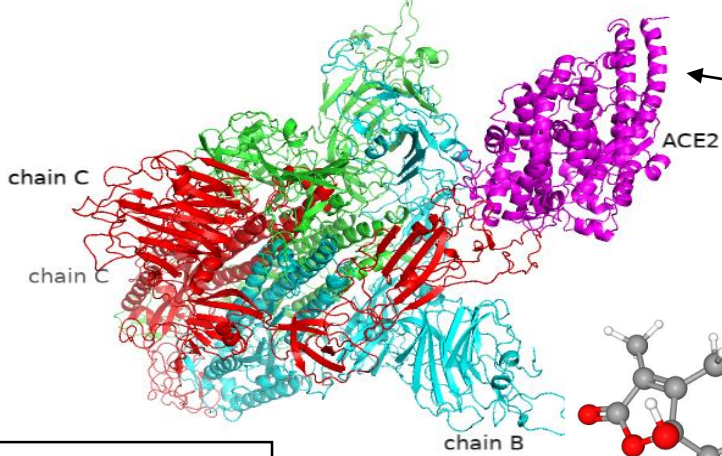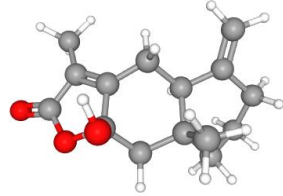

Atractylenolide III

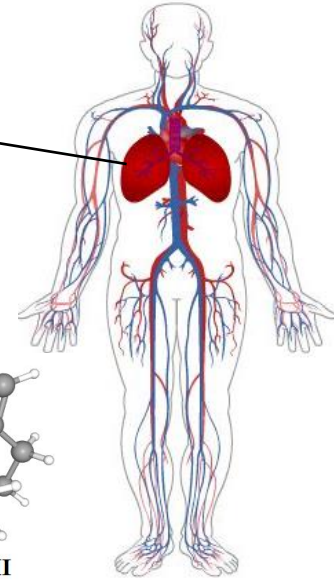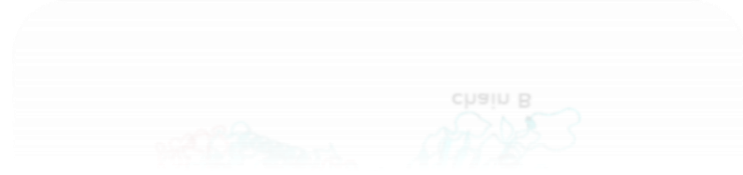

Supplement: 3219840.f1.pdf [file 3219840.f1.pdf]
